# Supplementary material for: Niobium Complexes Supported by Chalcogen-Bridged [OEO]-Type Bis(phenolate) Ligands (E = S, Se): Synthesis, Characterization, and Phenylacetylene Polymerization
Source: MDPI journal article supplement (doi:10.3390/molecules28062573), 2023-03-12
Supplement: s1 [file s1]

## Supplementary Materials

### Niobium Complexes Supported by Chalcogen-Bridged [OEO]-Type Bis(phenolate) Ligands (E = S, Se): Synthesis, Characterization, and Phenylacetylene Polymerization

Jin An, Akihiko Ishii, and Norio Nakata \*

Department of Chemistry, Graduate School of Science and Engineering,  
Saitama University, 255 Shimo-okubo, Sakura-ku, Saitama 338-8570, Japan

#### Table of Contents

|                                                                                                  |    |
|--------------------------------------------------------------------------------------------------|----|
| <b>Figure S1.</b> $^1\text{H}$ NMR spectrum of compound <b>3</b> .                               | S2 |
| <b>Figure S2.</b> $^{13}\text{C}\{^1\text{H}\}$ NMR spectrum of compound <b>3</b> .              | S2 |
| <b>Figure S3.</b> $^1\text{H}$ NMR spectrum of compound <b>4</b> .                               | S3 |
| <b>Figure S4.</b> $^{13}\text{C}\{^1\text{H}\}$ NMR spectrum of compound <b>4</b> .              | S3 |
| <b>Figure S5.</b> $^{77}\text{Se}\{^1\text{H}\}$ NMR spectrum of compound <b>4</b> .             | S4 |
| <b>Figure S6.</b> $^1\text{H}$ NMR spectrum of compound <b>5</b> .                               | S4 |
| <b>Figure S7.</b> $^{13}\text{C}\{^1\text{H}\}$ NMR spectrum of compound <b>5</b> .              | S5 |
| <b>Figure S8.</b> $^1\text{H}$ NMR spectrum of compound <b>6</b> .                               | S5 |
| <b>Figure S9.</b> $^{13}\text{C}\{^1\text{H}\}$ NMR spectrum of compound <b>6</b> .              | S6 |
| <b>Figure S10.</b> $^{77}\text{Se}\{^1\text{H}\}$ NMR spectrum of compound <b>6</b> .            | S6 |
| <b>Figure S11.</b> $^1\text{H}$ NMR spectrum of PPA (Table 3, entry 4).                          | S7 |
| <b>Figure S12.</b> $^1\text{H}$ NMR spectrum of the obtained crystals of <i>fac</i> - <b>4</b> . | S7 |

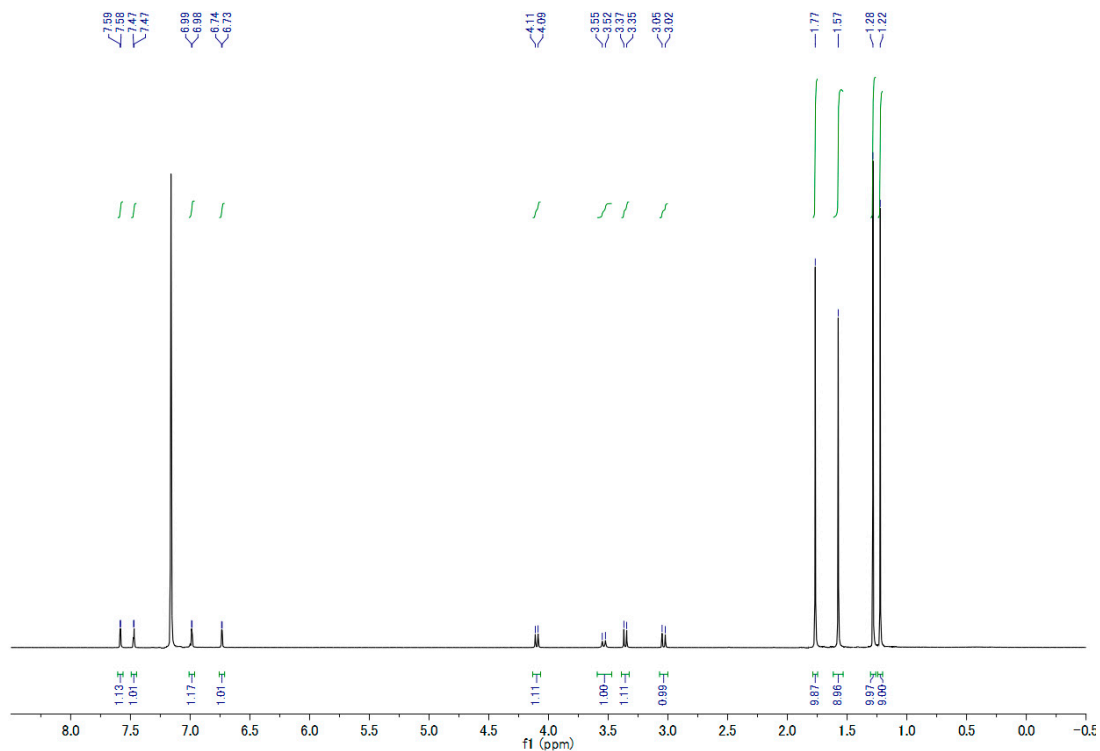

Figure S1. <sup>1</sup>H NMR spectrum of compound 3.

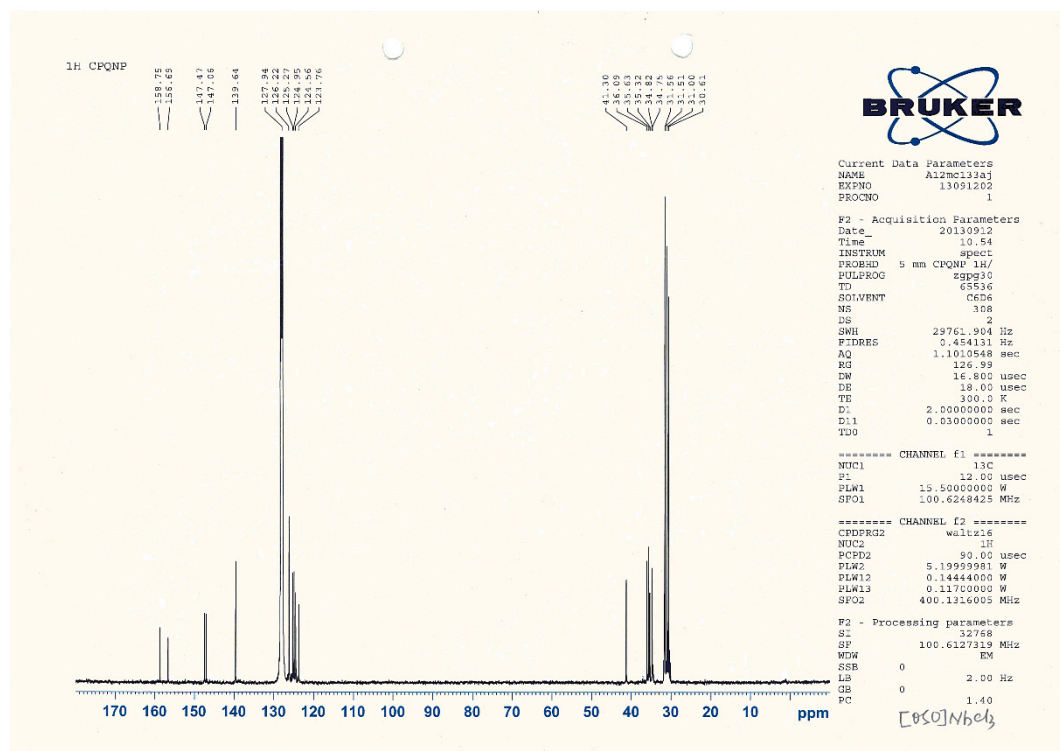

Figure S2. <sup>13</sup>C{<sup>1</sup>H} NMR spectrum of compound 3.

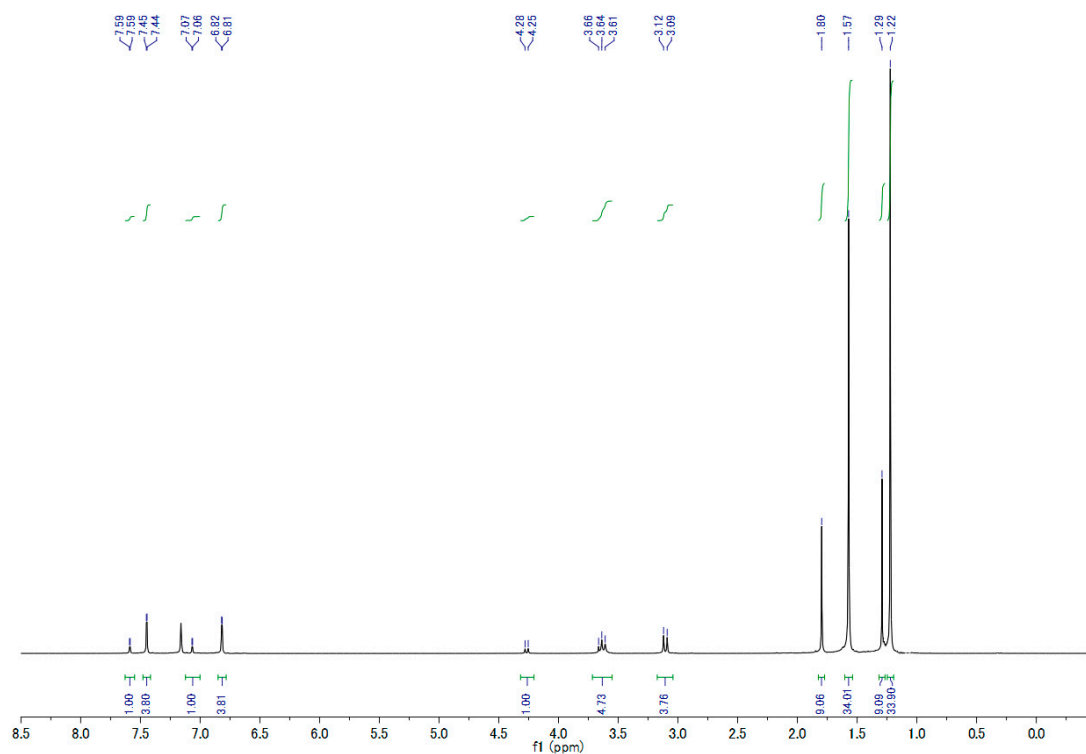

**Figure S3.** <sup>1</sup>H NMR spectrum of compound 4.

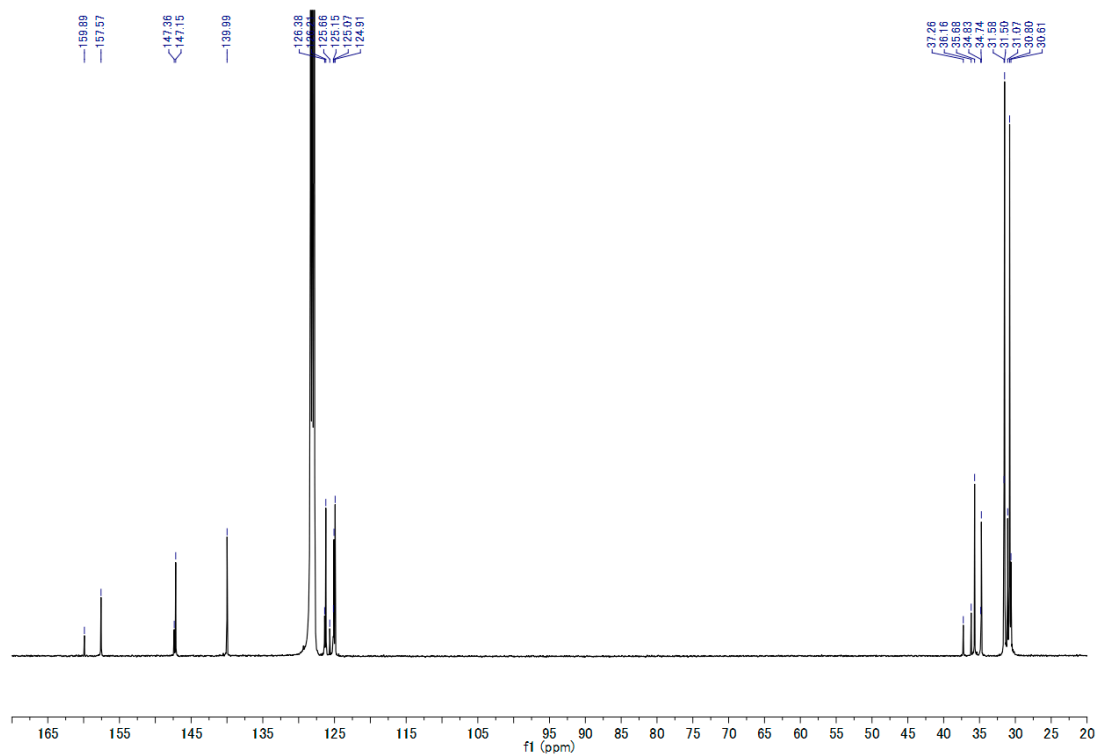

**Figure S4.** <sup>13</sup>C{<sup>1</sup>H} NMR spectrum of compound 4.

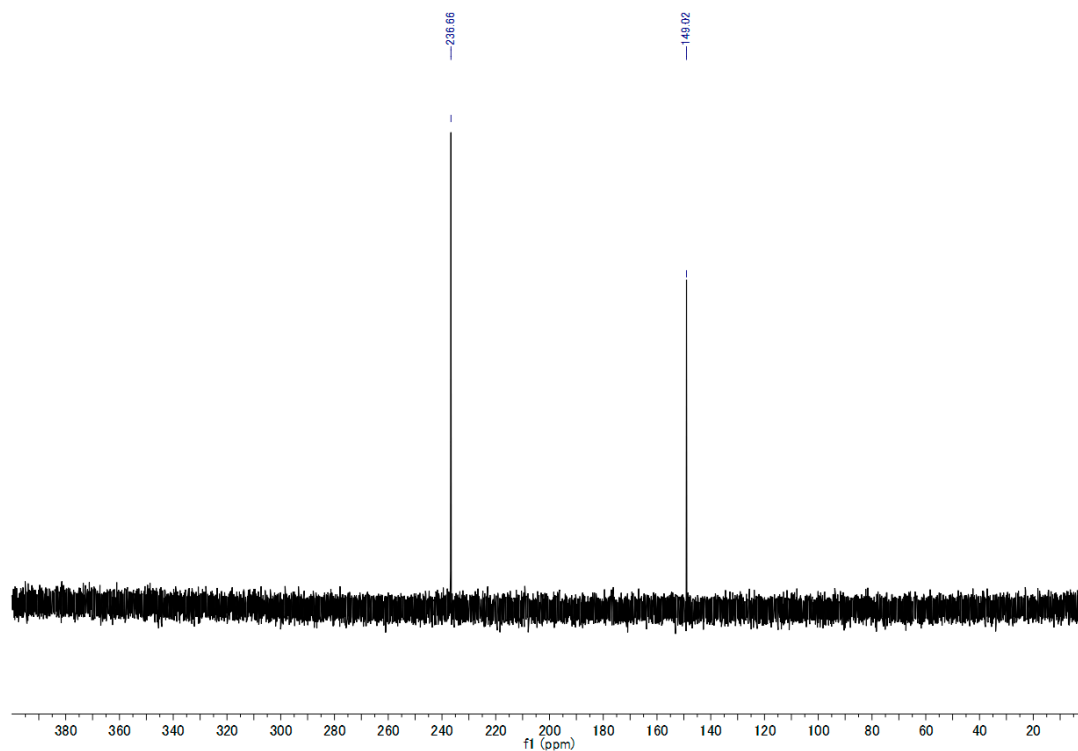

**Figure S5.**  $^{77}\text{Se}\{^1\text{H}\}$  NMR spectrum of compound **4**.

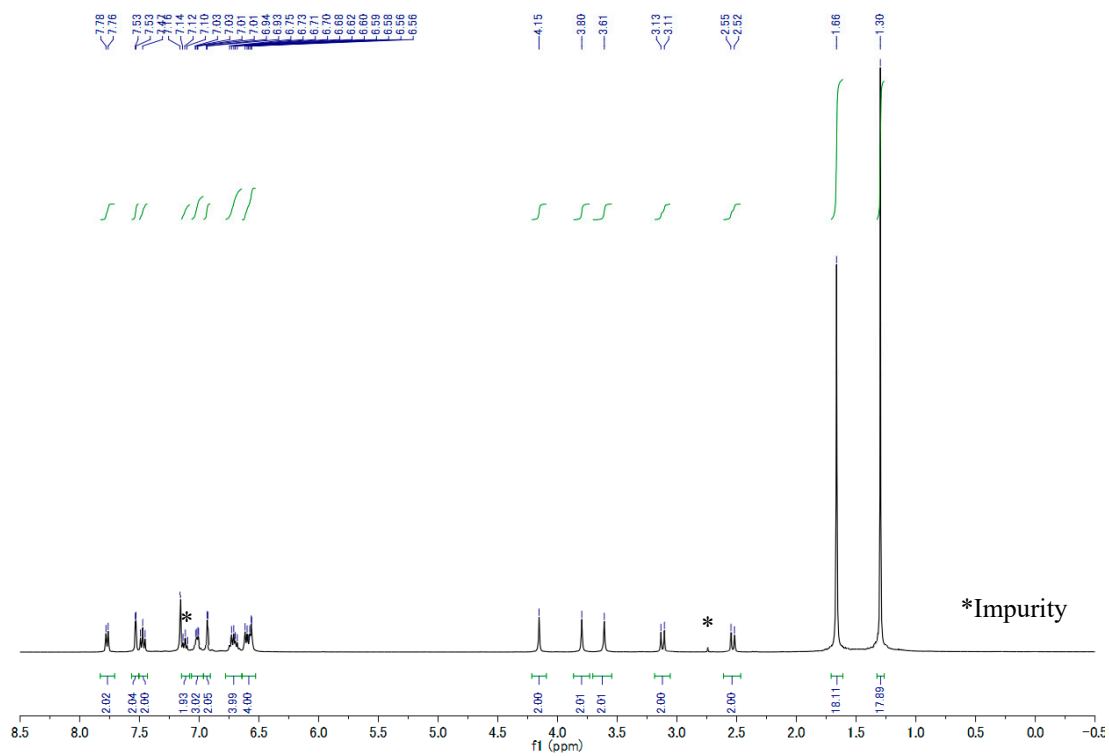

**Figure S6.**  $^1\text{H}$  NMR spectrum of compound **5**.

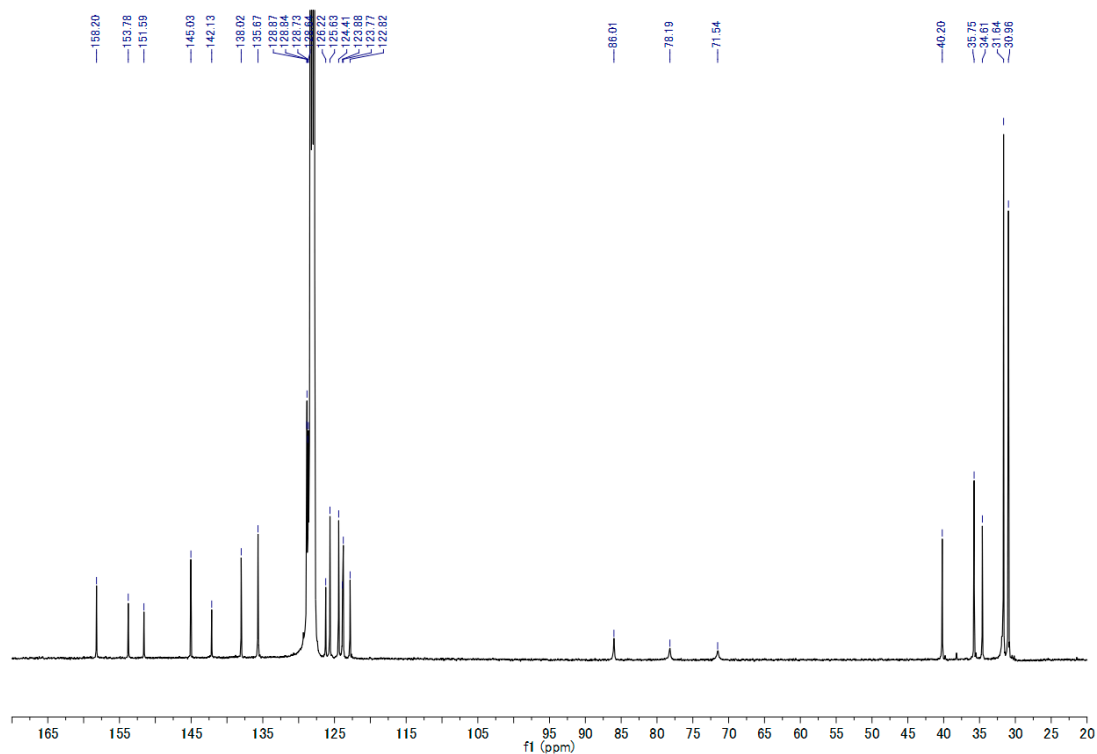

**Figure S7.**  $^{13}\text{C}\{^1\text{H}\}$  NMR spectrum of compound **5**.

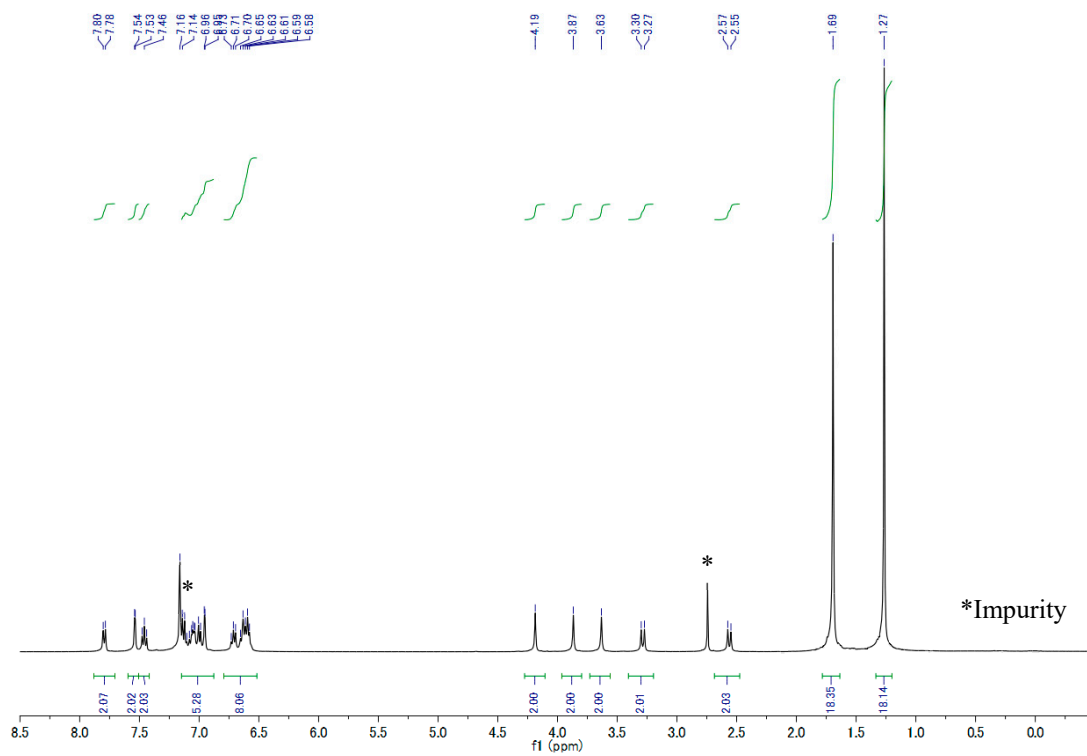

**Figure S8.**  $^1\text{H}$  NMR spectrum of compound **6**.

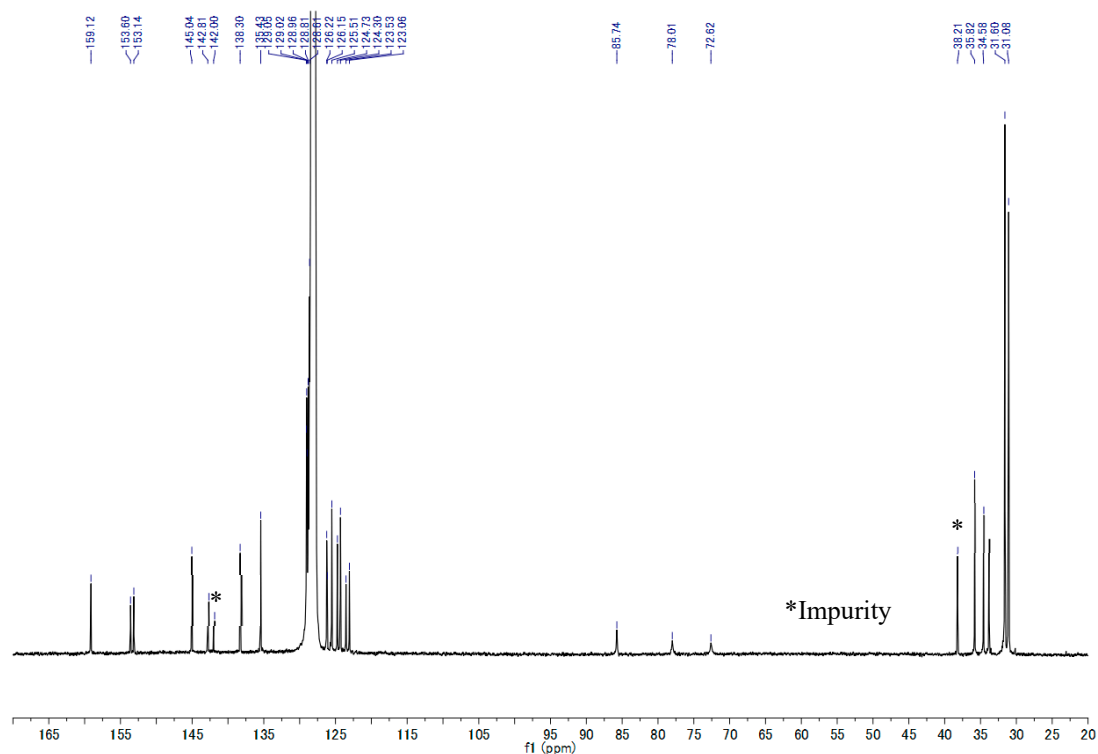

Figure S9.  $^{13}\text{C}\{^1\text{H}\}$  NMR spectrum of compound 6.

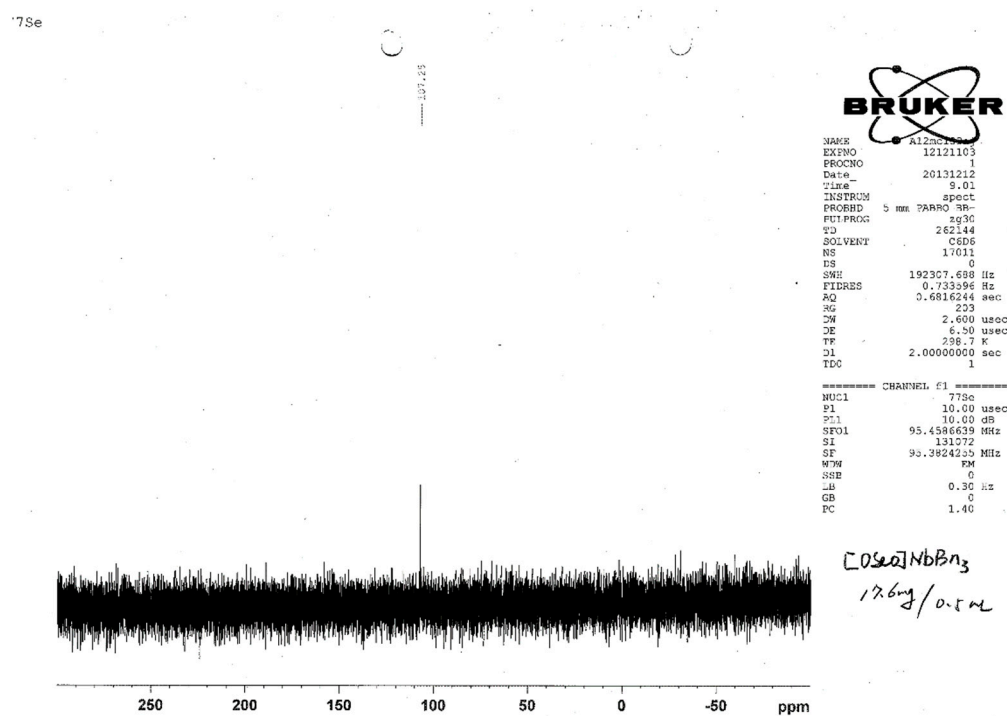

Figure S10.  $^{77}\text{Se}\{^1\text{H}\}$  NMR spectrum of compound 6.

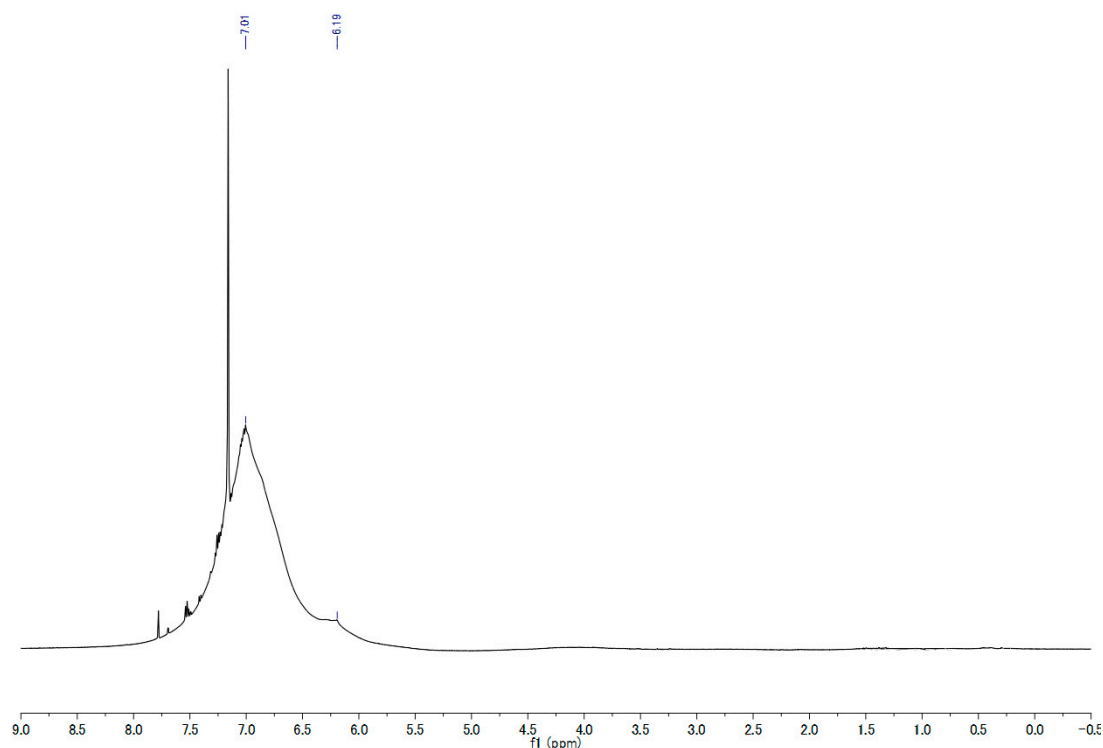

**Figure S11.**  $^1\text{H}$  NMR spectrum of PPA (Table 3, entry 4).

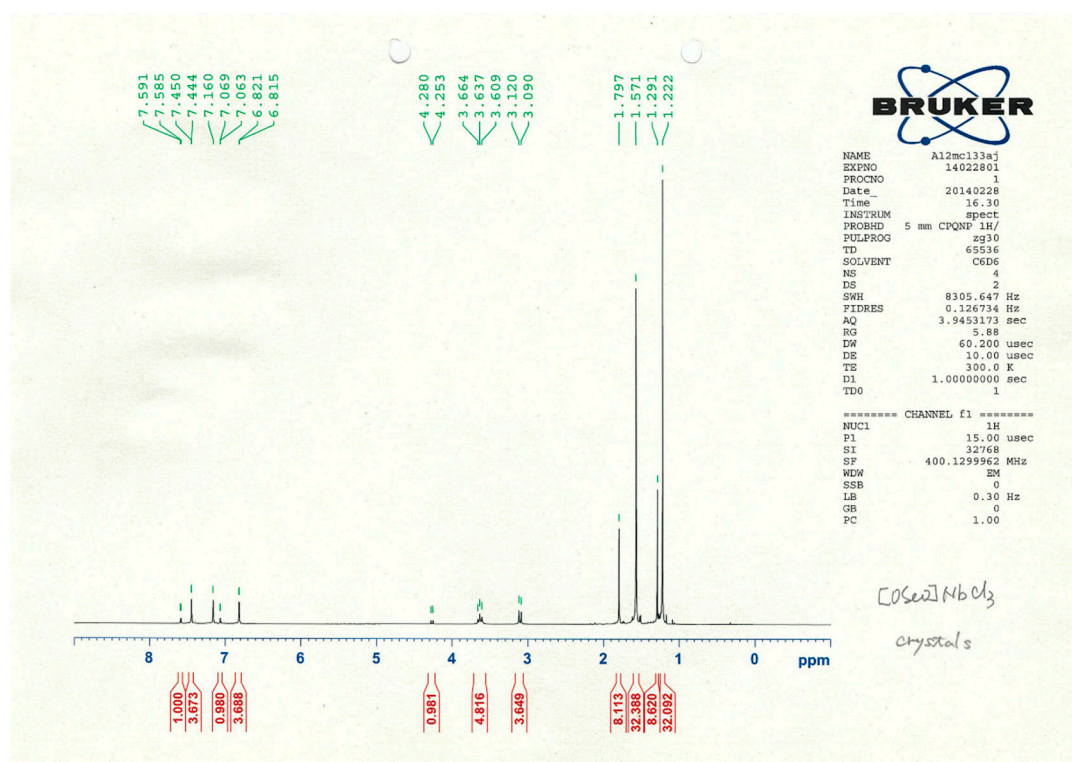

**Figure S12.**  $^1\text{H}$  NMR spectrum of the obtained crystals of *fac*-4.
